# Supplementary figures and images for: Evolution of an intricate J-protein network driving protein disaggregation in eukaryotes
Source: eLife journal article supplement (doi:10.7554/elife.24560), 2017-05-13

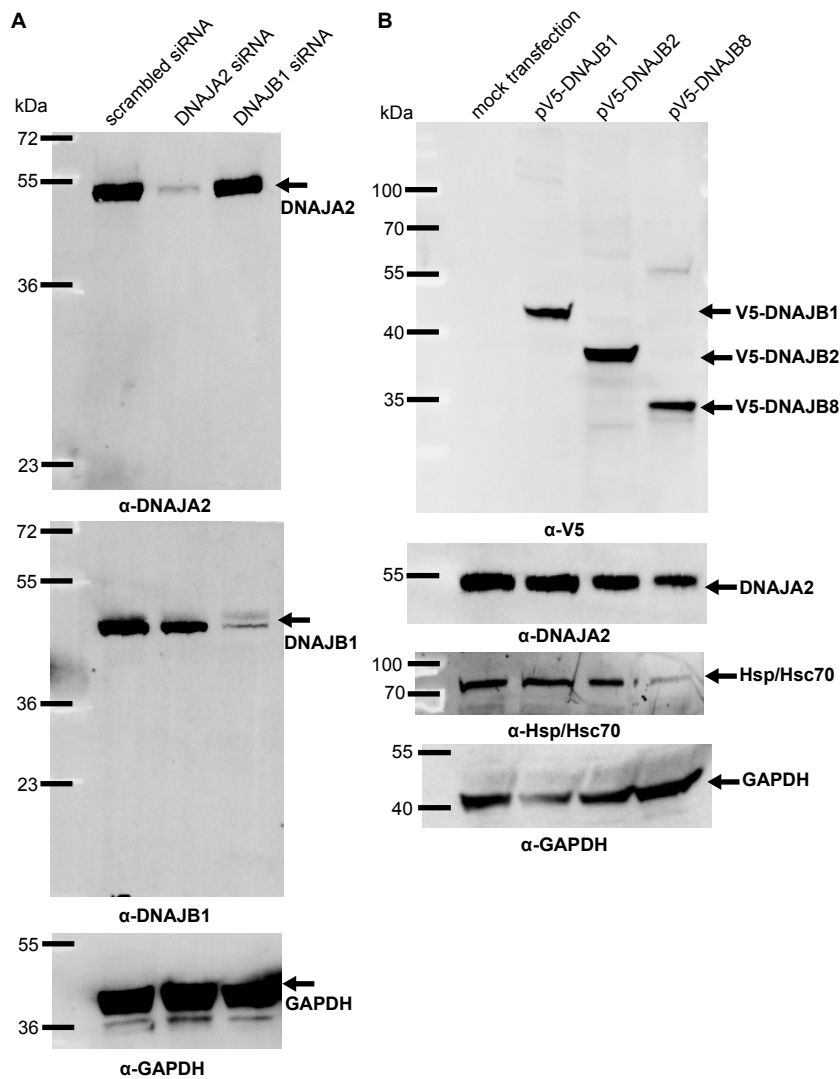

Figure 3 - figure supplement 1

Supplement: supp [file elife-24560-supp-v1.zip]

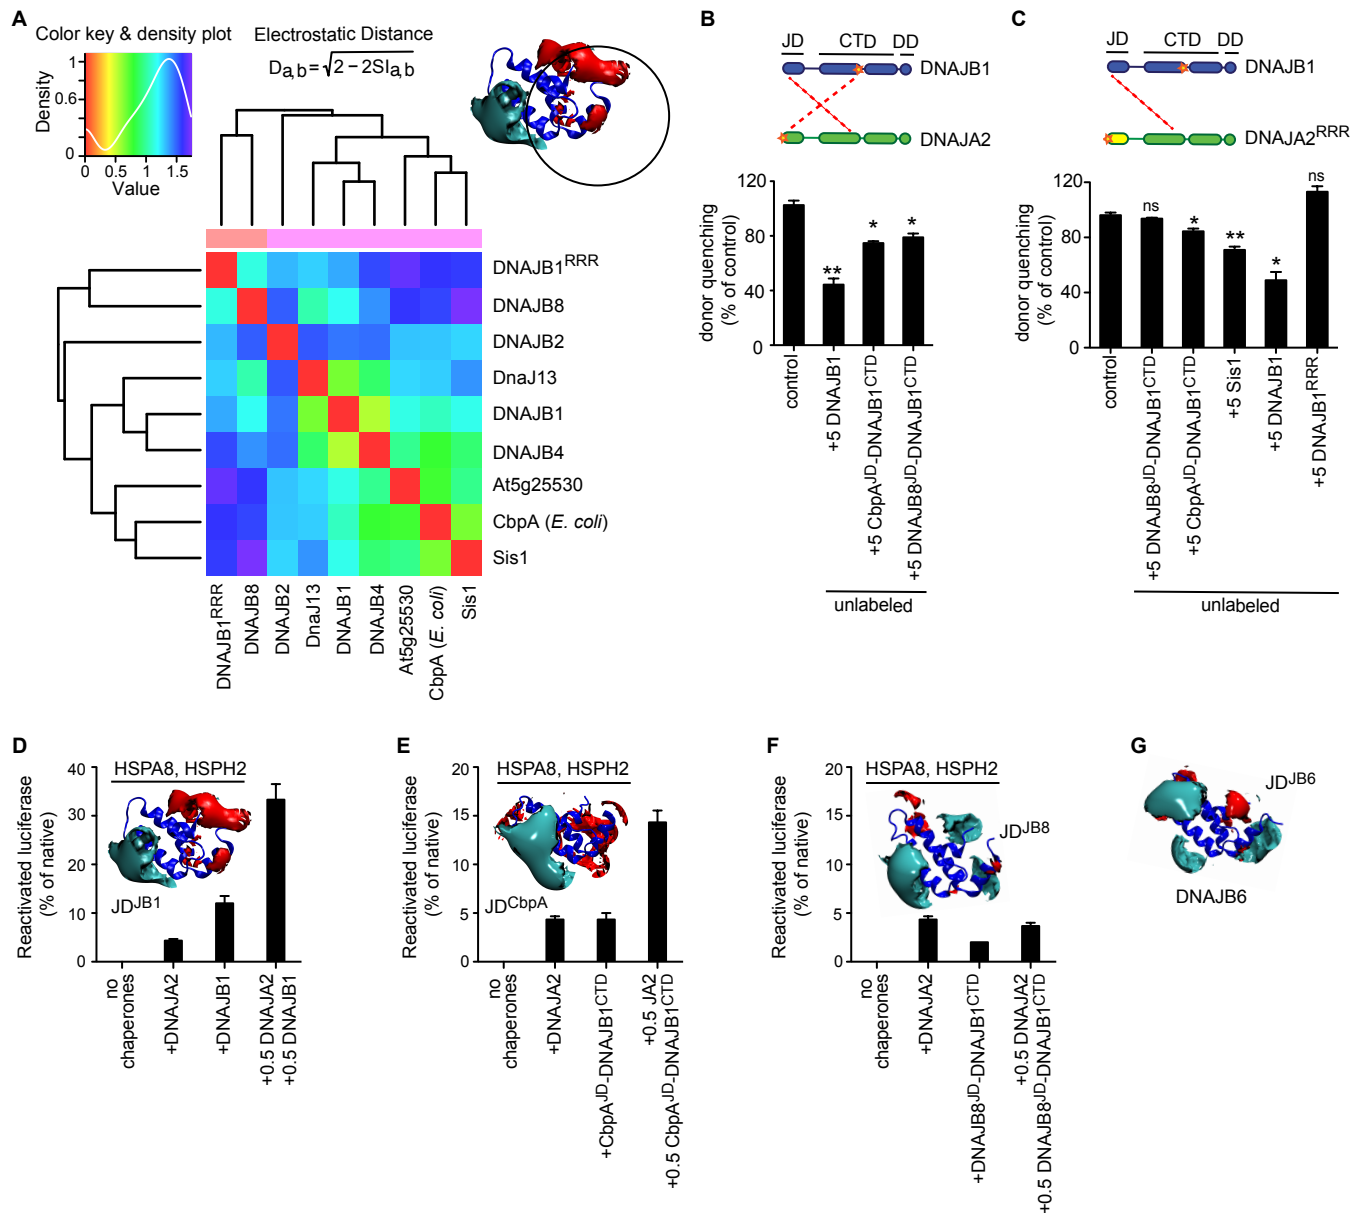

Figure 5 - figure supplement 1

Supplement: supp [file elife-24560-supp-v1.zip]

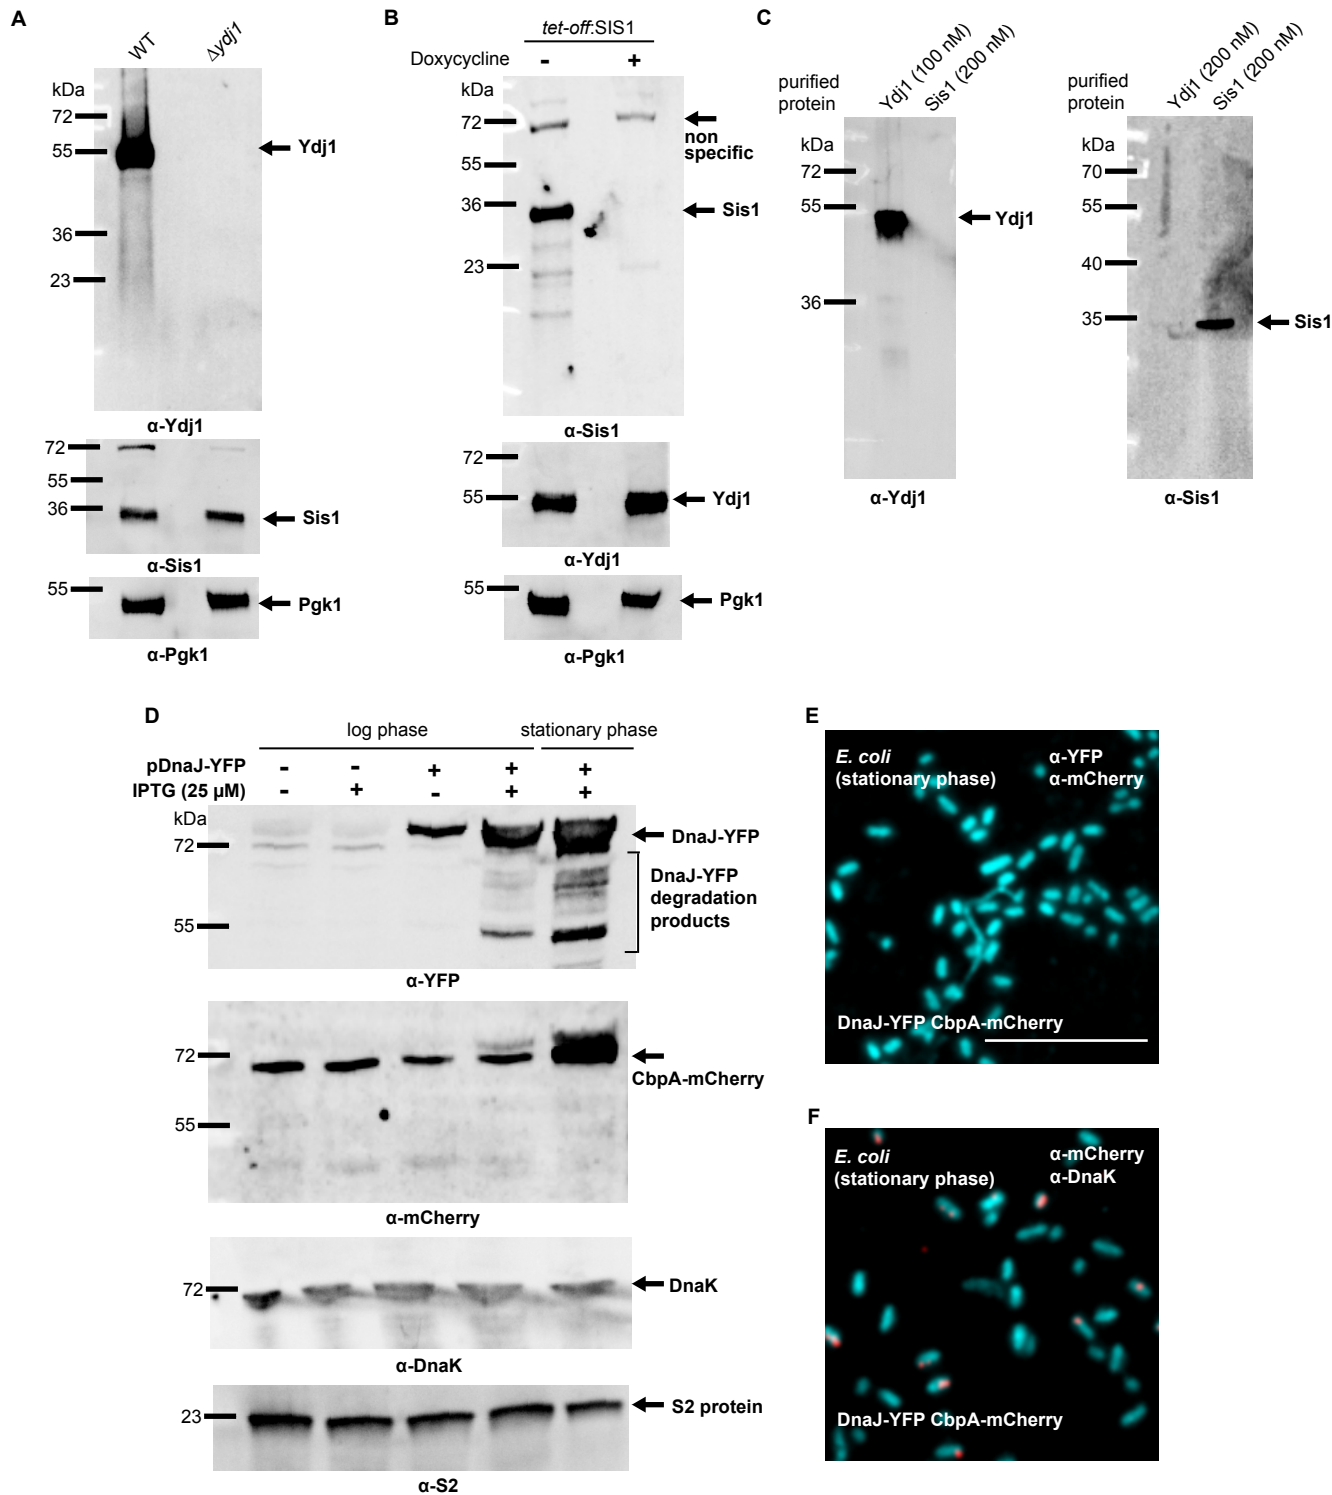

Figure 3 - figure supplement 2

Supplement: supp [file elife-24560-supp-v1.zip]

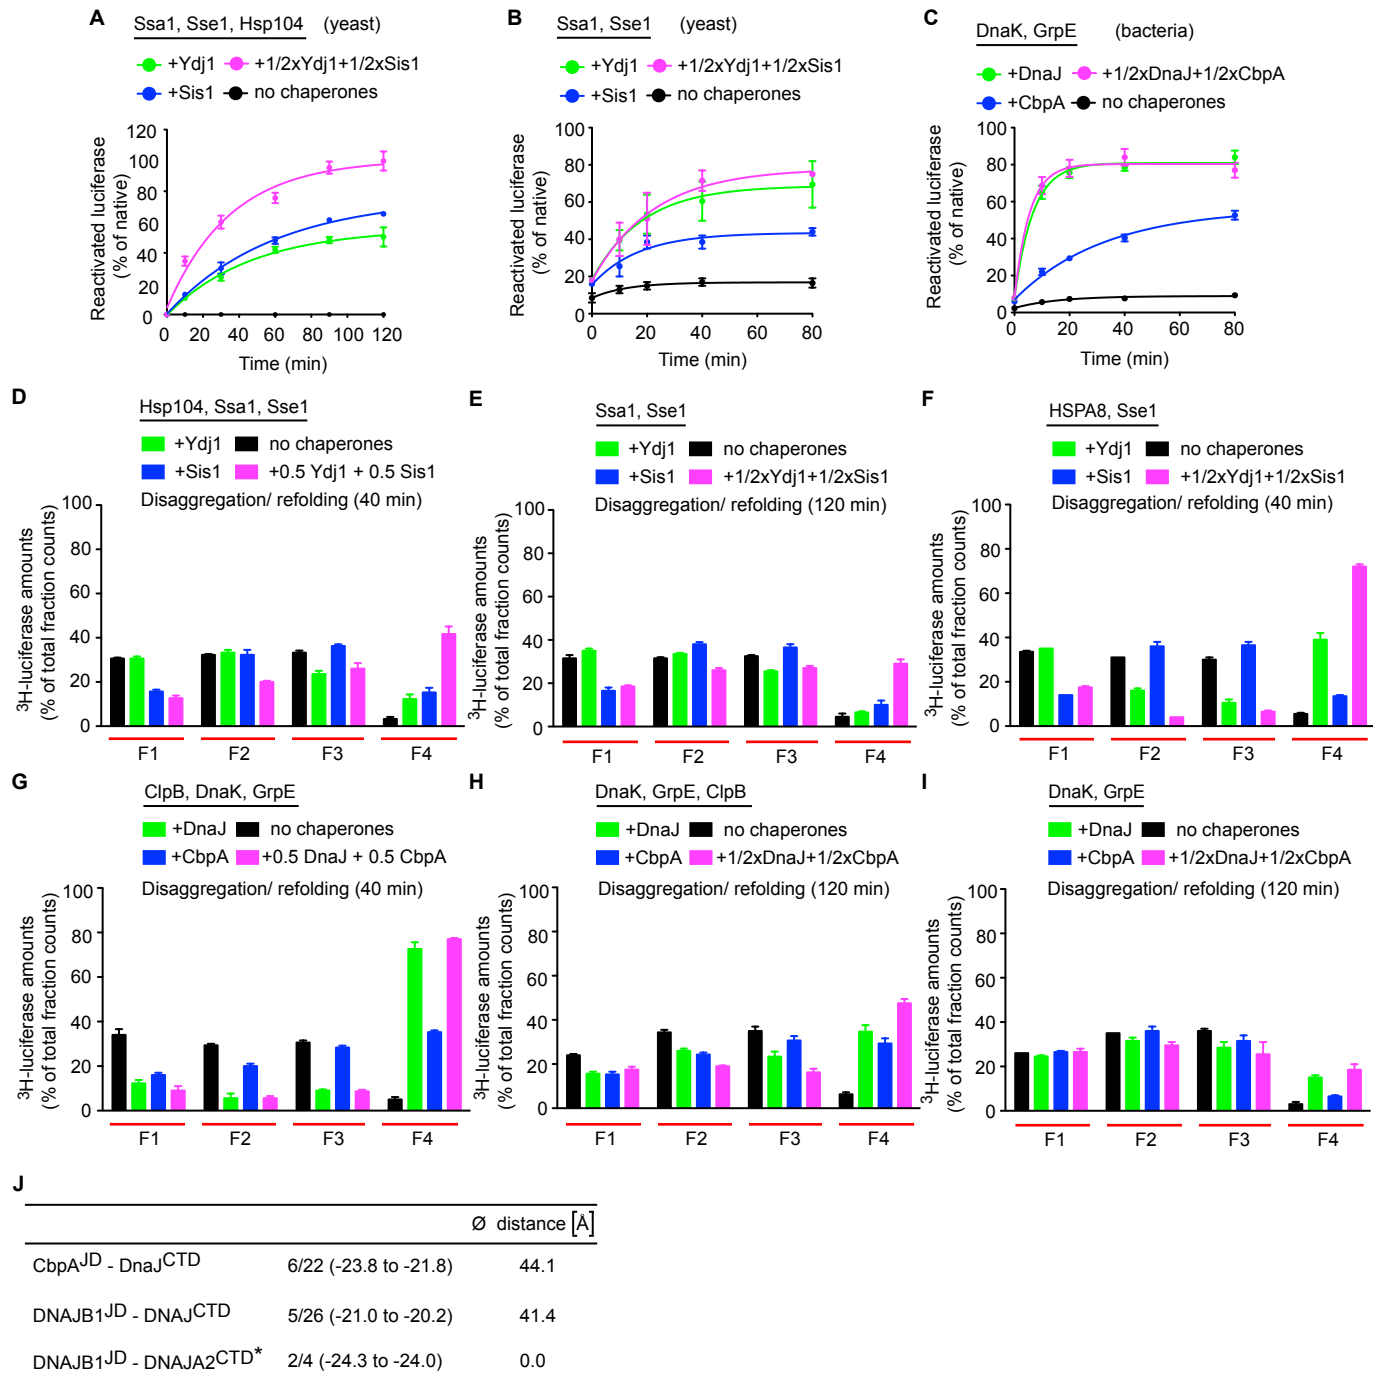

\* data taken from ref. Nillelegoda et al., 2015

Figure 4 - figure supplement 1

Supplement: supp [file elife-24560-supp-v1.zip]

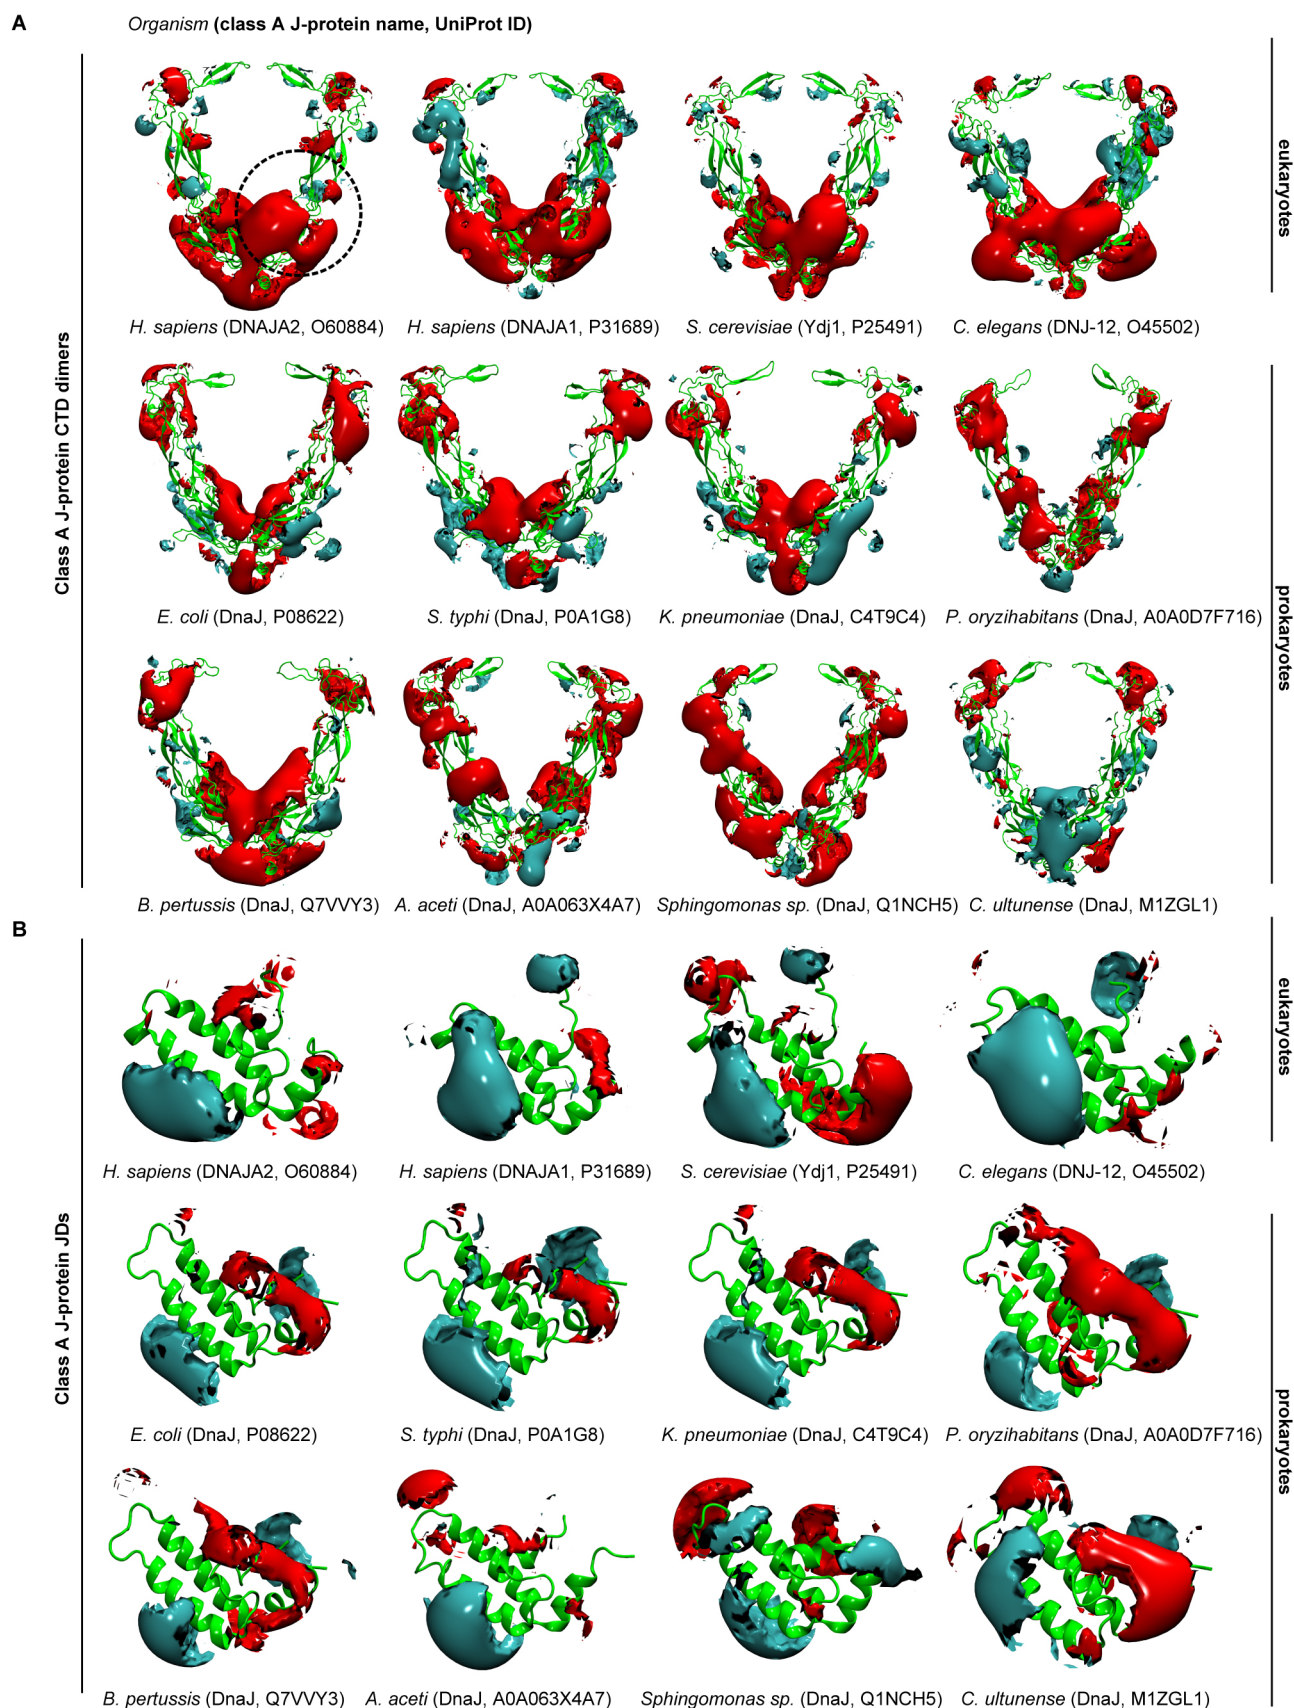

Figure 1 - figure supplement 1

Supplement: supp [file elife-24560-supp-v1.zip]

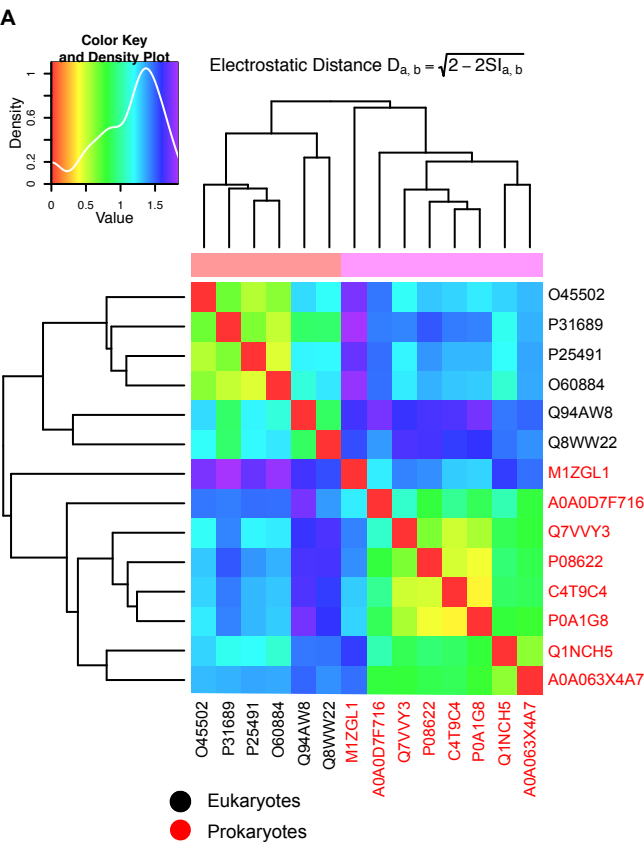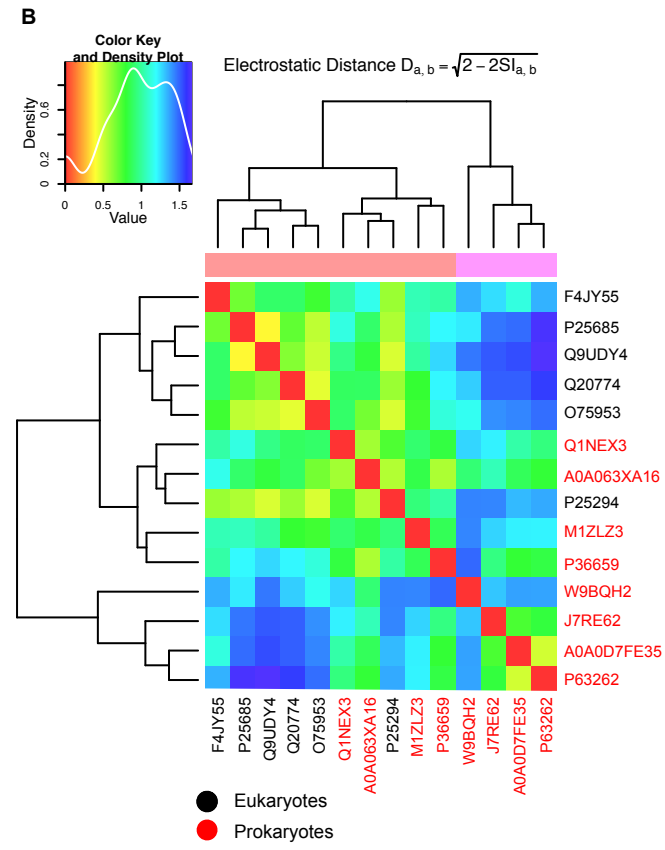

Figure 1 - figure supplement 3

Supplement: supp [file elife-24560-supp-v1.zip]

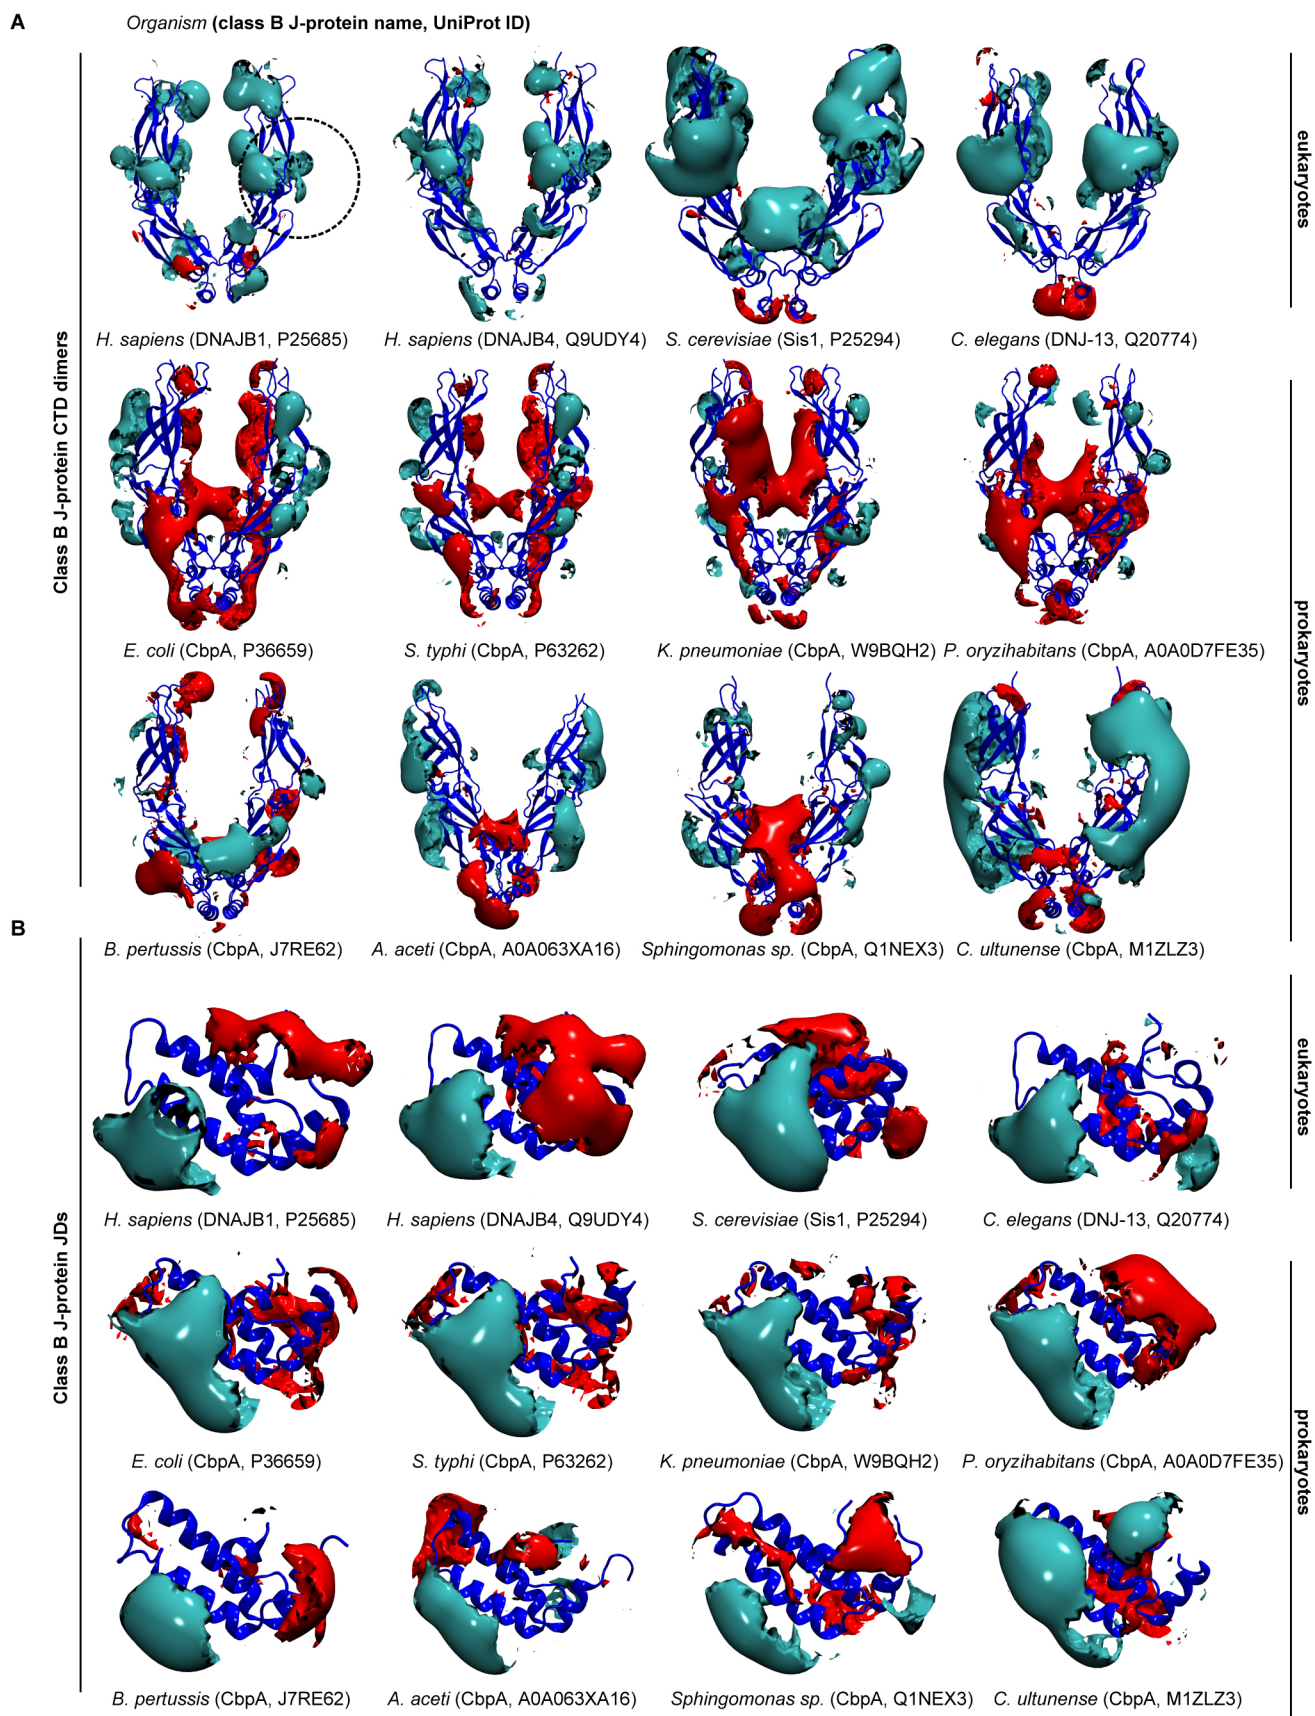

Figure 1 - figure supplement 2

Supplement: supp [file elife-24560-supp-v1.zip]

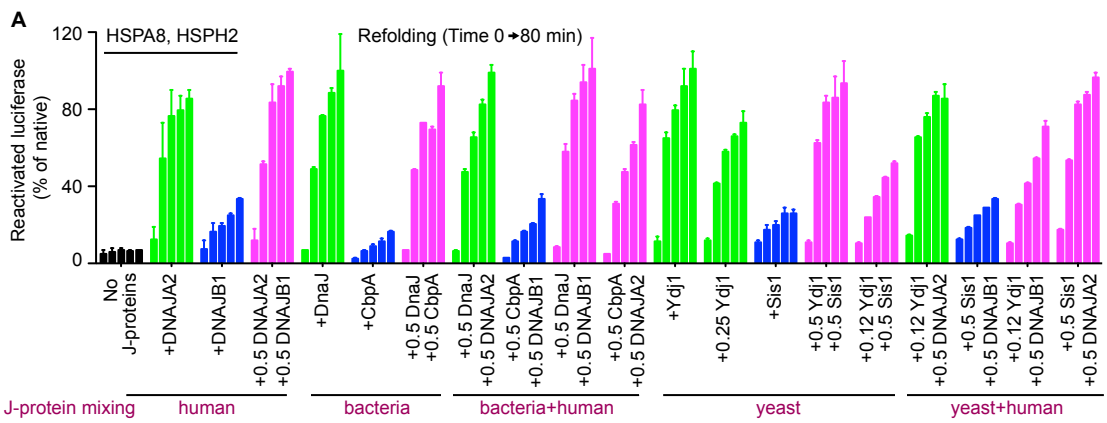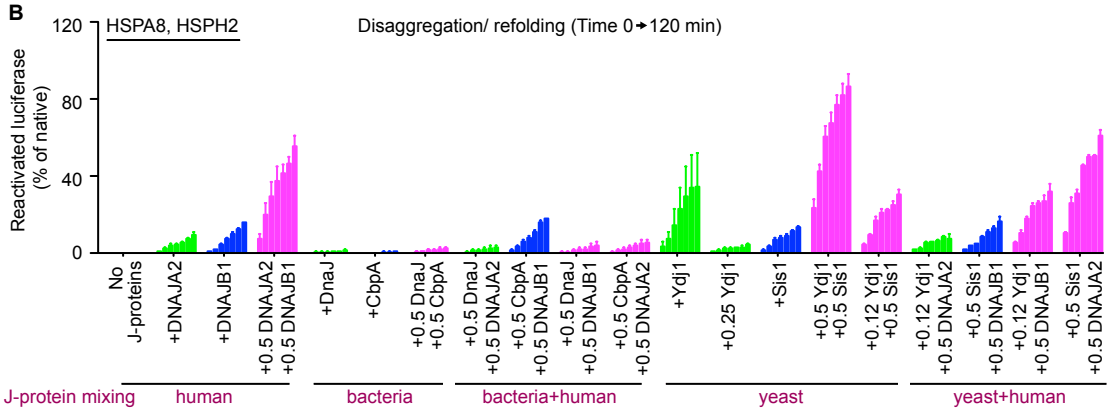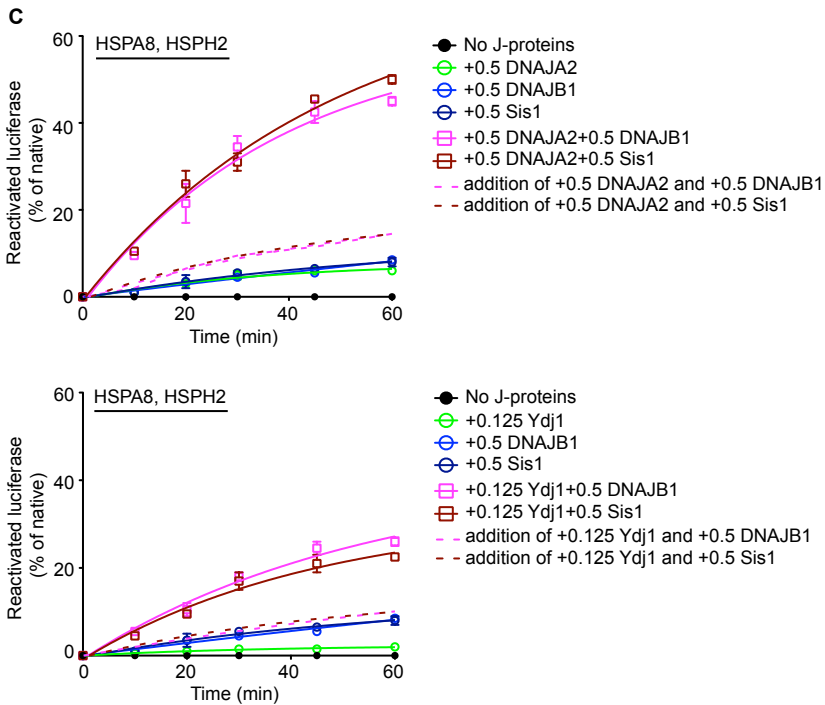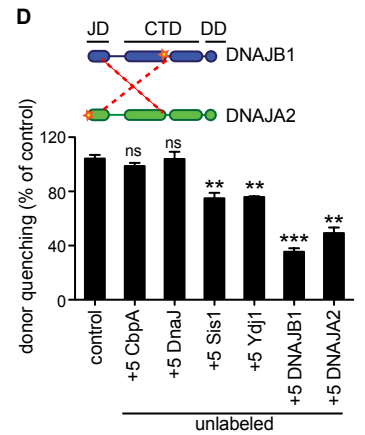

Figure 4 - figure supplement 2

Supplement: supp [file elife-24560-supp-v1.zip]

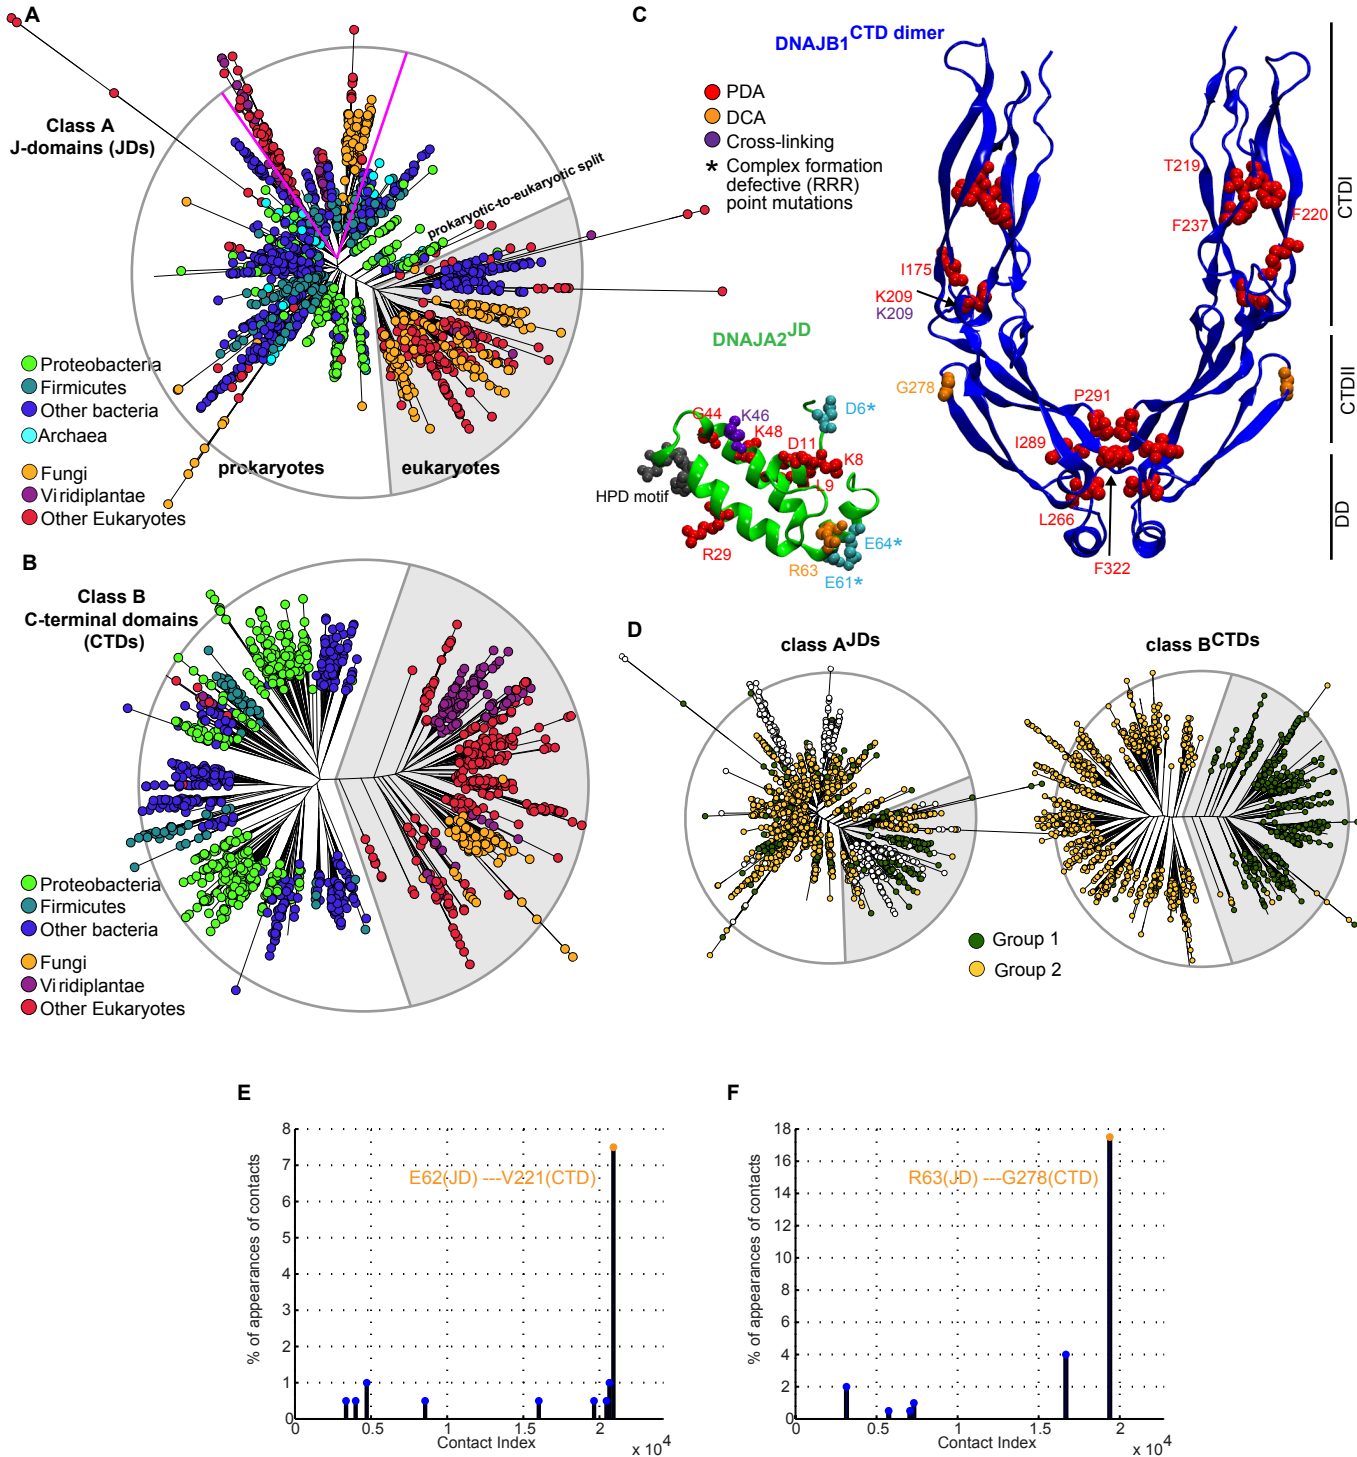

Figure 2 - figure supplement 1

Supplement: supp [file elife-24560-supp-v1.zip]

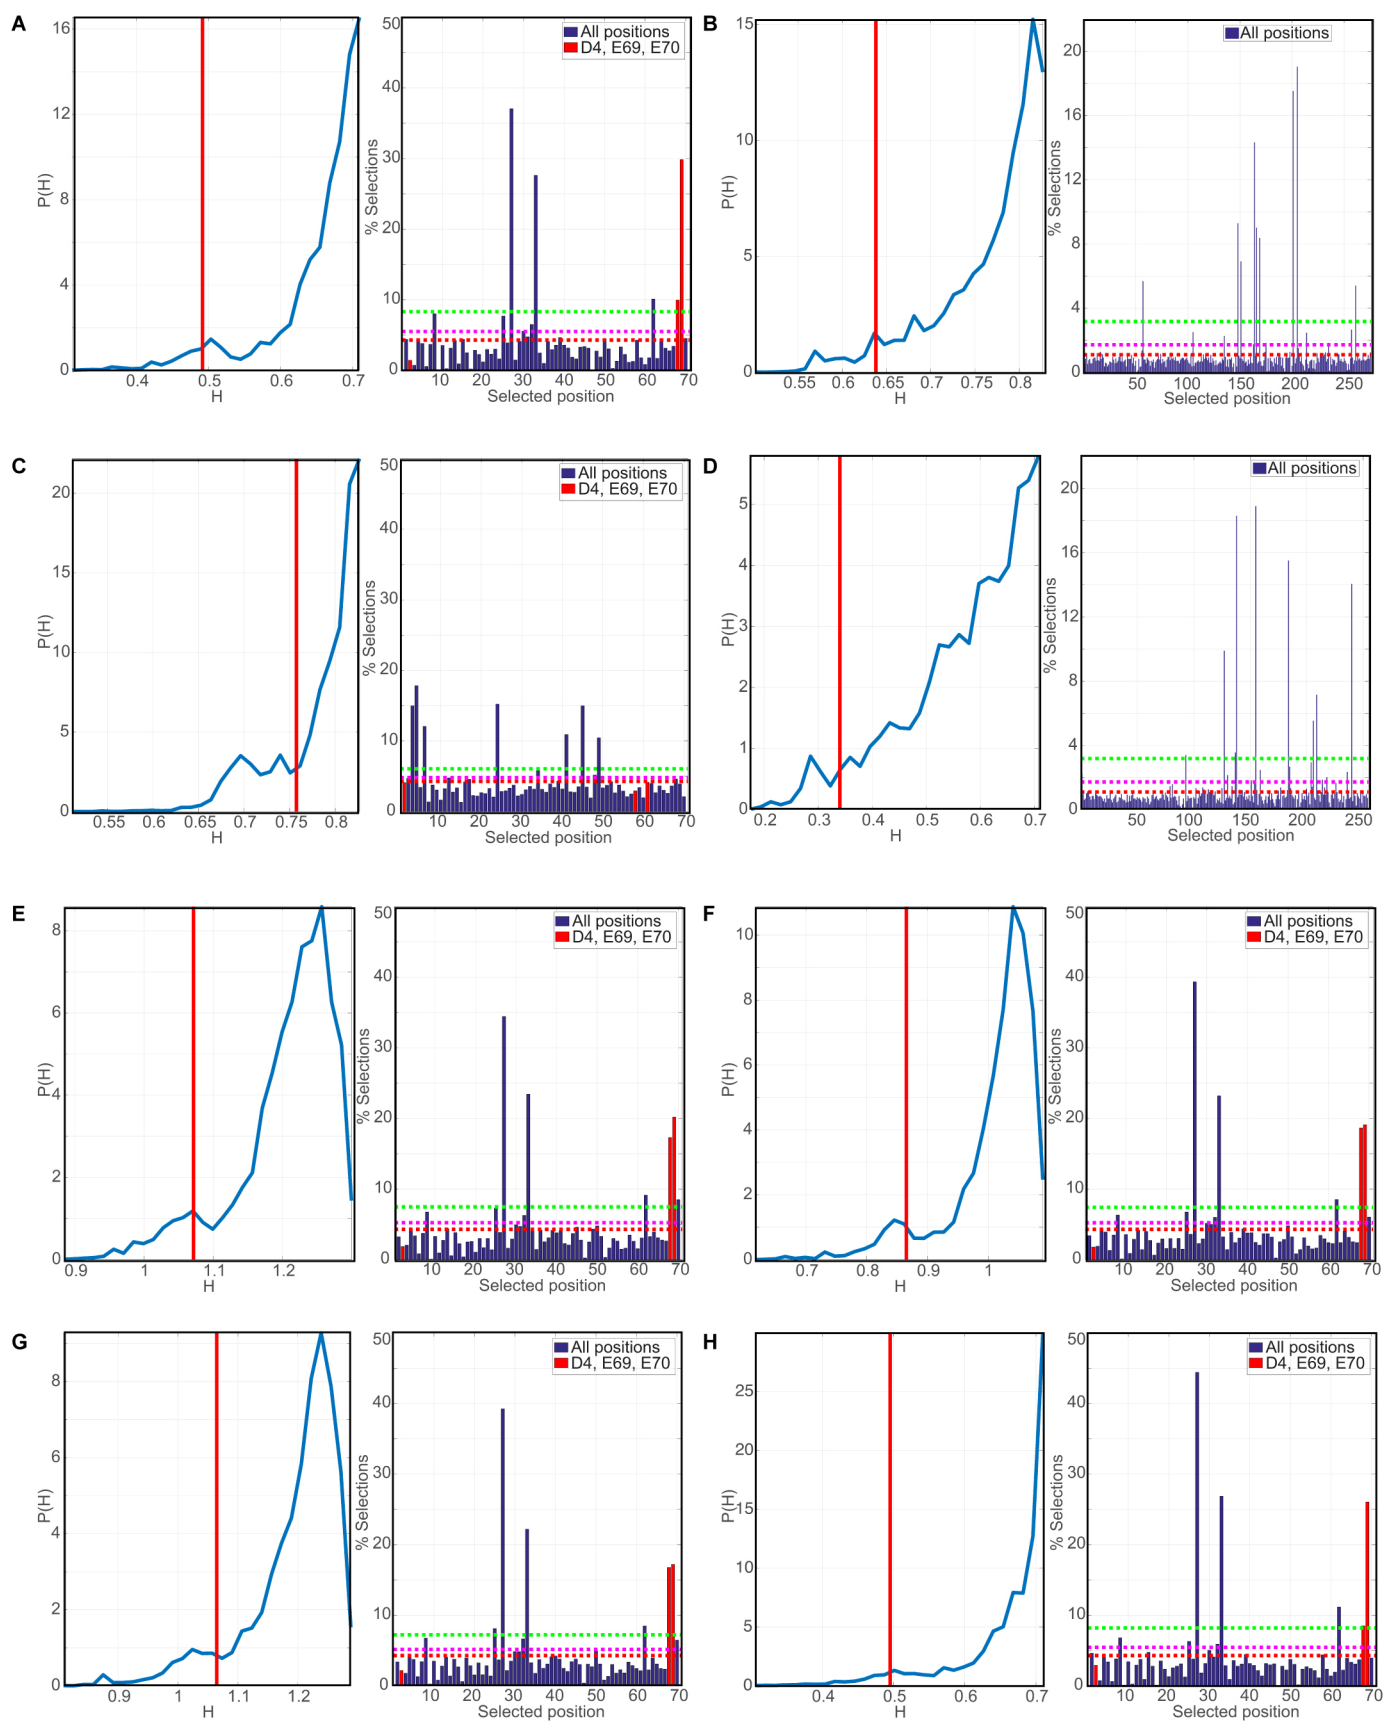

Figure 2 - figure supplement 2

Supplement: supp [file elife-24560-supp-v1.zip]
